# Supplementary material for: Off-clamp partial nephrectomy has a positive impact on short- and long-term renal function: a systematic review and meta-analysis
Source: Springer Nature journal article supplement (doi:10.1186/s12882-018-0993-3), 2018-07-31

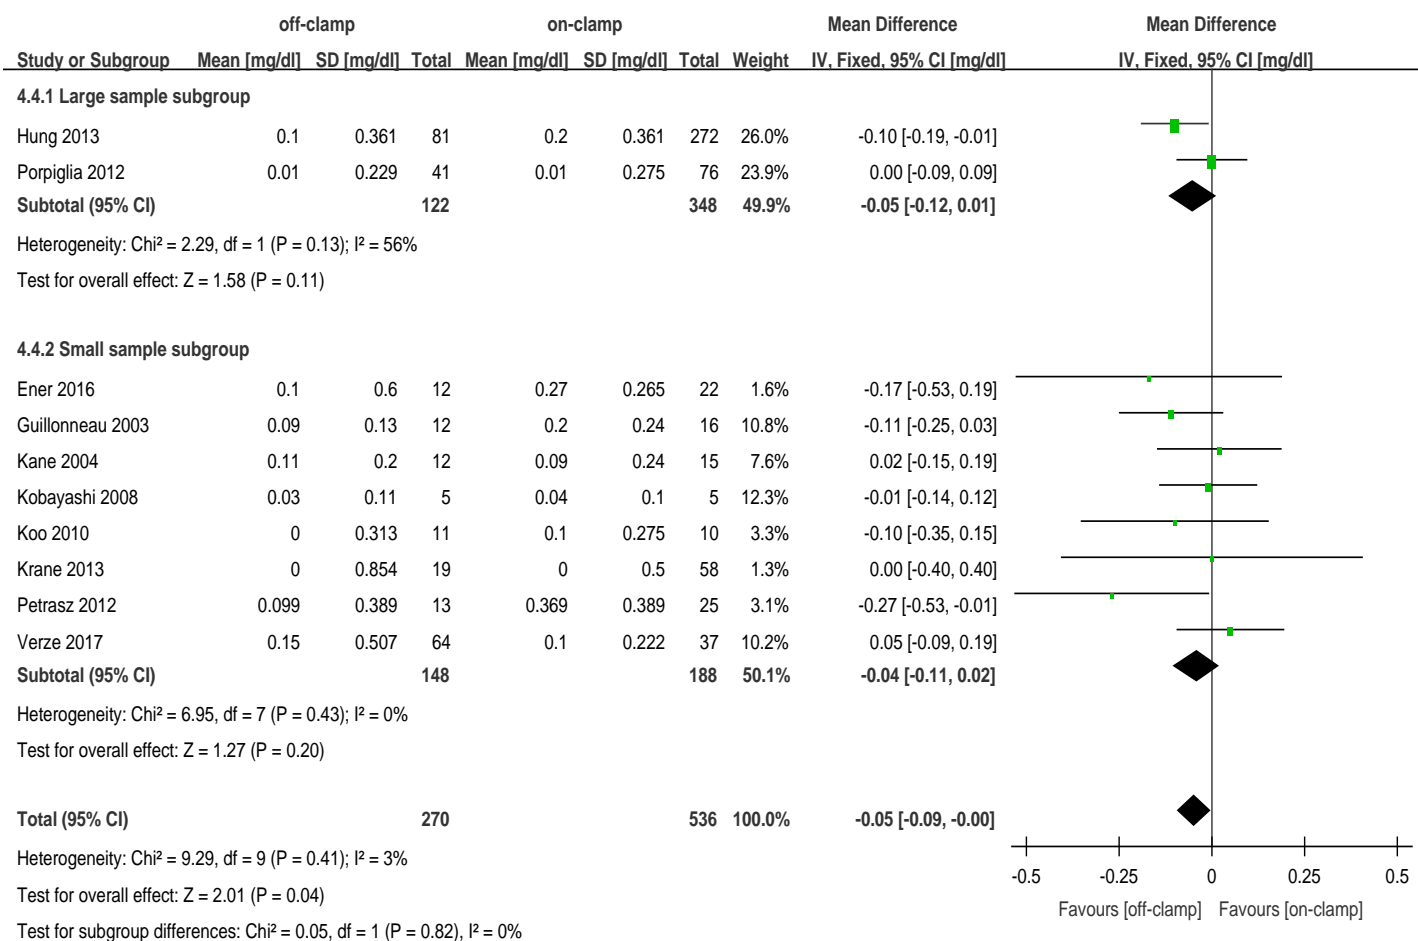

Supplement: MOESM8 [file 15991754]
